# Supplementary material
Source: PubMed Central journal article supplement (PMC2784184)
Supplement: NIHMS146103-supplement-02.pdf [file NIHMS146103-supplement-02.pdf]

## Supplemental Figures

Trim43a, Trim43b, and Trim43c: novel mouse genes expressed specifically in mouse preimplantation embryos

Ilaria Stanghellini, Geppino Falco, Sung-Lim Lee, Manuela Monti and Minoru S. H. Ko

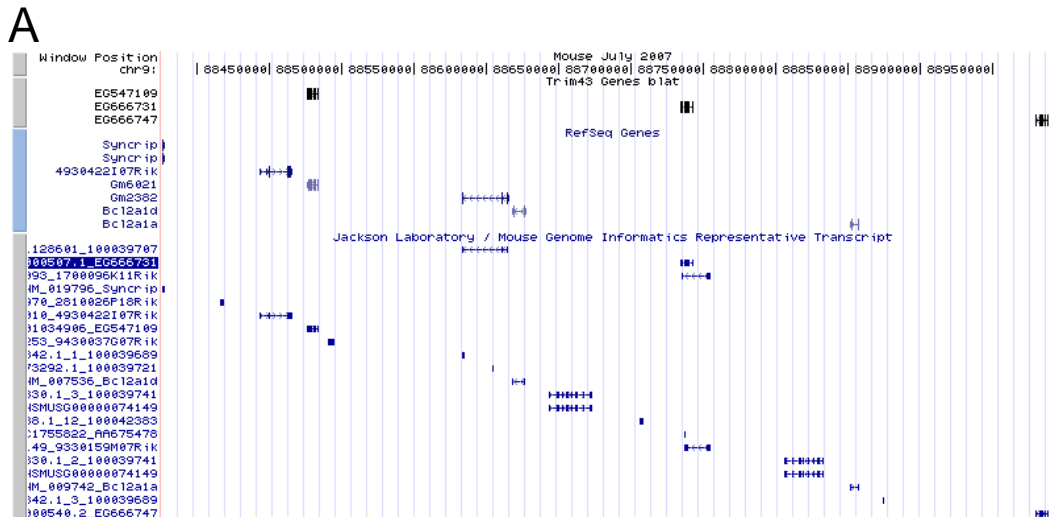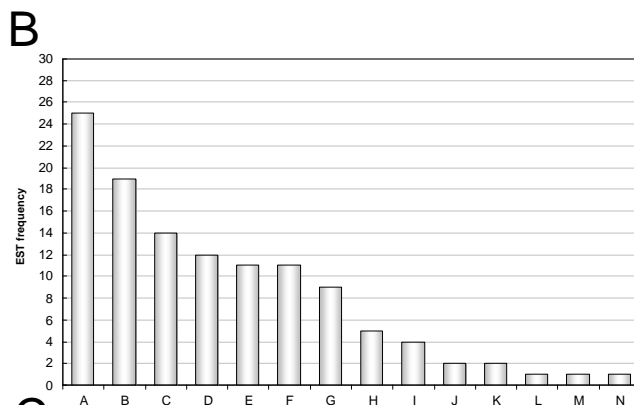

A: NIA Mouse eight-cell-Embryo cDNA library (Long)  
 B: RIKEN full-length enriched, 8 cells embryo  
 C: RIKEN full-length enriched, blastocyst  
 D: NIA Mouse Blastocyst cDNA Library (Long)  
 E: eight-cell stage embryo cDNA  
 F: NIA Mouse four-cell-Embryo cDNA library (Long)  
 G: embryo, Knowles Solter 2 cell  
 H: NIA Mouse 15K cDNA Clone Set  
 I: RIKEN full-length enriched, 2 cell egg  
 J: sixteen-cell-embryo cDNA  
 K: NIA Mouse Unique gene Set Version 2  
 L: blastocyst cDNA  
 M: RIKEN full-length enriched, adult male testis  
 N: RIKEN full-enriched, pooled tissues, 1 cell embryo..

**C**

**Expression Report for TC1513598**

Total ESTs found in TC1513598: 117

| Cat# | Library                                                         | # of ESTs | % of library total |
|------|-----------------------------------------------------------------|-----------|--------------------|
| #FAS | NIA Mouse eight-cell-Embryo cDNA library (Long)                 | 25        | <> 0.26            |
| #9TL | RIKEN full-length enriched, 8 cells embryo                      | 19        | <> 0.18            |
| #BUL | RIKEN full-length enriched, blastocyst                          | 14        | <> 0.13            |
| #9PA | NIA Mouse Blastocyst cDNA Library (Long)                        | 12        | <> 0.05            |
| MB36 | eight-cell stage embryo cDNA                                    | 11        | <> 0.32            |
| #FAT | NIA Mouse four-cell-Embryo cDNA library (Long)                  | 11        | <> 0.11            |
| MA49 | embryo, Knowles Solter 2 cell                                   | 9         | <> 0.06            |
| #8DE | NIA Mouse 15K cDNA Clone Set                                    | 5         | <> 0.02            |
| 5391 | RIKEN full-length enriched, 2 cells egg                         | 4         | <> 0.03            |
| MB52 | sixteen-cell-embryo cDNA                                        | 2         | <> 0.06            |
| #EN3 | NIA Mouse Unique Gene Set Version 2                             | 2         | <> 0.04            |
| MB08 | blastocyst cDNA                                                 | 1         | <> 0.02            |
| 2511 | RIKEN full-length enriched, adult male testis                   | 1         | <> 0.01            |
| #BU9 | RIKEN full-length enriched, pooled tissues, 1 cell embryo, etc. | 1         | <> 0.06            |

**Supplemental Figure S1. A.** Genome coordinates of EG547109 (Trim43a), EG666747 (Trim43b), EG666731 (Trim43c) in the UCSC Mouse Genome Browser (July 2007). **B.** Frequency of expressed sequence tags (ESTs) in the public EST database (NCBI/NIH). **C.** Frequency of expressed sequence tags (ESTs) in the public EST database (TIGR Gene Index).

```

Trim43a -----
Trim43b AGATTGGCCAAGGTGTTAGTTCATCTCTCATCCATTAGAAATAATCCCACTTAAGGGAG 60
Trim43c AGATTGGCCAAGGTGTTAGTTCATCTCTCATCCATTAGAAATAATCCCACTTAAGAGAG 60

Trim43a -----
Trim43b CTCATCTATTGGAAGCATTAGTAAAAGGGAGGAAGTGGGTCTTTAGAGACTCTAA 120
Trim43c CTCATCTATTGGAAGCATTAGTAAAAGGGAGGAATGGGTCTTTAGAGACTCTAA 120

Trim43a -----CATTCTTCTCCAGACCAGAGGTAGAGTGTTCCTAA 35
Trim43b GTACATCCCTGGGGCCACCAGGTTCACTTCTCTCCAGACCAGAGGTAGAGTGTTCCTAA 180
Trim43c GTACATCCCTGGGGCCACCAGGTTCACTTCTCTCCAGACCAGAGGTAGAGTGTTCCTAA 180
***** ** *****

Trim43a CCTTTTGCTCCAGACACTGCTAGATCTATCACCTCACTCTCTGAGGATCTGATCTCAGAG 95
Trim43b CCTTTTGCTCCAGACACTGCTAGATCTATCACCTCACTCTCTGAGGATCTGATCTCAGAG 240
Trim43c CCTTTTGCTCCAGACACTGCTAGATCTATCACCTCACTCTCTGAGGATCTGATCTCAGAG 240
*****

Trim43a CTGAGCGAGTATCGCATTGTCTACCAACATTGTCTAAGCAGGGACGGGATAATTGCTTGG 155
Trim43b CTGAGCTAGTATCGCATTGTCTACCAAGCATTGTCTAAGCAGGGACCGGAATAATTGCTTGG 300
Trim43c CTGAGCTAGTATCGCATTGTCTACCAAGCATTGTCTAAGCAGGGACGGGATAATTGCTTGG 300
***** * *****

Trim43a AAAAAATGGAATCAGACAATTTACAAGACCCTCAGGAGGAAACACTCACCTGCTCCATCTG 215
Trim43b AAAAAATGGAATCAGACAATTTACAAGACCCTCAGGAGGAAACACTCACCTGCTCCATCTG 360
Trim43c AAAAAATGGAATCAGACAATTTACAAGACCCTCAGGAGGAAACACTCACCTGCTCCATCTG 360
*****

Trim43a CCAGAGTATCTTTATGAATCCAGTTTATTTAAGGTGTGGCCATAAGTTCTGCGAGGCATG 275
Trim43b CCAGGGTATCTTTATGAATCCAGTTTATTTAAGGTGTGGCCATAAGTTCTGCGAGGCATG 420
Trim43c CCAGGGTATCTTTATGAATCCAGTTTATTTAAGGTGTGGCCATAAGTTCTGCGAGGCATG 420
**** *****

Trim43a TCTCTTACTTTCTCAAGAAGACATCAAATTCCTGCCTACTGCCCACTGTGTATGCAACC 335
Trim43b TCTCTTACTTTCTCAAGAAGACATCAAATTCCTGCCTACTGCCCACTGTGTATGCAACC 480
Trim43c TCTCTTACTTTCTCAAGAAGACATCAAATTCCTGCCTACTGCCCACTGTGTATGCAACC 480
***** *****

Trim43a ATTTAACCAGGAATATATAAATGACATTTCTCTGAAGAAGCAGGTGTCCATTGTCAGAAA 395
Trim43b ATTTAACCAGGAATATATAAATGACATTTCTCTGAAGAAGCAGGTGTCCATTGTCAGAAA 540
Trim43c ATGCAACCAGAGATATATAAATGACATTTCTCTGAAGAAGCAGGTGTCCATTGTCAGAAA 540
** *****

Trim43a GAAAGGCTCATGAATATTTGAATTTAGGAGCACAAGTGTGTGACCCACAAGGCAAA 455
Trim43b GAAAGGCTCATGAATATTTGAATTTAGGAGCACAAGTGTGTGACCCACAAGGCAAA 600
Trim43c GAAAGGCTCATGAATATTTGAATTTAGGAGCACAAGTGTGTGACCCACAAGGCAAA 600
***** *****

Trim43a AAAGATGATCTTCTGTGATAAGAGCAAGATCCCTCTGTACCTGTGTTCTGACTCCCA 515
Trim43b AAAGATGATCTTCTGTGATAAGAGCAAGATCCCTCTGTACCTGTGTTCTGACTCCCA 660
Trim43c AAAGATGATCTTCTGTGATAAGAGCAAGATCCCTCTGTACCTGTGTTCTGACTCCCA 660
*****

Trim43a GGAGCACAGTGGTCACACACTGTTCCATTGATGTAGCTGTTTCAGGAGAAAATGGAGGA 575
Trim43b GGAGCACAGCGGTCACACACTGTTCCATTGATGTAGCTGTTTCAGGAGAAAATGGAGGA 720
Trim43c GGAGCACAGCGGTCACACACTGTTCCATTGATGTAGCTGTTTCAGGAGAAAATGGAGGA 720
*****

Trim43a ACTTCTAAAGCACATGGACTCATTATGGCGGAGGCTCAAATCCAGCAGAATTATGTAGA 635
Trim43b ACTTCTAAAGCACATGGACTCATTATGGCGGAGGCTCAAATCCAGCAGAATTATGTAGA 780
Trim43c ACTTCTAAAGCACATGGACTCATTATGGCGAGGCTCAAATCCAGCAGAATTATGTAGA 780
*****

Trim43a AATAGAGAGGAGAACGACCTTGTGGTGGTTG---TCCGTGAAGCTACGGGAGGAAGTGAT 692
Trim43b AAAGAGAGGAGAACGACCTTGTGGTGGTTGAAGTCCATGAAGCTACGGGAGGAAGTGAT 840
Trim43c AAAGAGAGGAGAAATGACCTTGTGGTGGTTGAAGTCCGTGAAGCTACGGGAGGAAGTGAT 840
** *****

Trim43a CAAGAGAGTGTATGAAAAACAATGTCCACCCCTCTGTGAAGAAAGGGATCAACACATAGA 752
Trim43b CAAGAGAGTGTATGAAAAACAATGTCCACCCCTCTGTGAAGAAAGGGATCAACACATAGA 900
Trim43c CAAGAGAGTGTATGAAAAACAATGTCCACCCCTCTGTGAAGAAAGGGATCAACACATAGA 900
*****

Trim43a GTGTTTGAGACATCAAAGCAACTACTTTAGAGGAGCTCAGGAAAAGTGAAGCTACGAT 812
Trim43b GTGTTTGAGACATCAAAGCAACTACTTTAGAGGAGCTCAGGAAAAGTGAAGCTACGAT 960
Trim43c GTGTTTGAGACATCAAAGCAACTACTTTAGAGGAGCTCAGGAAAAGTGAAGCTACGAT 960
*****

Trim43a AGTCCACGAGAGAAATCAACTAATAGAGGTTTATCGGGAGCTGATGACAATGTCCAGAG 872
Trim43b AGTCCACGAGAGAAATCAACTAATAGAGGTTTATCGGGAGCTGATGACAATGTCCAGAG 1020
Trim43c AGTCCACGAGAGAAATCAACTAATAGAGGTTTATCGGGAGCTGATGACAATGTCCAGAG 1020
*****

Trim43a GCCATACCAGGAGCTGCTGGTGCAGGACTTGGATGACTTGTTCAGAAGGAGTAAGCTAGC 932
Trim43b GCCATACCAGGAGCTGCTGGTGCAGGACTTGGATGACTTGTTCAGAAGGAGTAAGCTAGC 1080
Trim43c GCCATACCAGGAGCTGCTGGTGCAGGACTTGGATGACTTGTTCAGAAGGAGTAAGCTAGC 1080
*****

Trim43a GGCAAAGCTGGACATGCCACAGGGTATGATACCAAGACTCCATGCCCATTCCTCTCGG 992
Trim43b GGCAAAGCTGGACATGCCACAGGGTATGATACCAAGACTCCATGCCCATTCCTCTCGG 1140
Trim43c GGCAAAGCTGGACATGCCACAGGGTATGATACCAAGACTCCATGCCCATTCCTCTCGG 1140
*****

```

Supplemental  
Figure S2.



CLUSTAL 2.0.10 multiple sequence alignment of Trim43 genes

```

Trim43a    MESDNLQDPQEETLTCSICQSIFMNPVYLRCGHKFCEACLLLSQEDIKFPAYCPMCMQPF 60
Trim43b    MESDNLQDPQEETLTCSICQGIFMNPVYLKCGHKFCEACLLLFQEDIKFPAYCPMCMQPF 60
Trim43c    MESDNLQDPQEETLTCSICQGIFMDPVYLRCGHKFCETCLLLFQEDIKFPAYCPTCRQPC 60
*****.***:***:***:***:*** ***** * **

Trim43a    NQEYINDISLKKQVSIVRKKRLMKYLNSKEHKCVTHKAKMIFCDKSKILLCHLCSDSQE 120
Trim43b    NQEYINDISLKKQVSIVRKKRLMEYLNSEEHKCVTHKAKMIFCDKSKILLCHLCSDSQE 120
Trim43c    NQRYINDISLKKQVFIVRKKRLMEYLNSEEHKCVTHKAKMIFCDKSKILLCHLCSDSQE 120
**.*:***** *****:***:*****

Trim43a    HSGHTHCSIDVAVQEKMEELLKHMDSLRRLKIQQNYVEIERRTTLWWLS-VKLREEVIK 179
Trim43b    HSGHTHCSIDVAVQEKMEELLKHMDSLRRLKIQQNYVEKERRTTLWWLKSMKLREEVIK 180
Trim43c    HSGHTHCSIDVAVQEKMEELLKHMDSLQRLKIQQNYVEKERRMTLWWLKSVKLREEVIK 180
*****:***** ** *****. :*****

Trim43a    RVYGKQCPPLCEERDQHIECLRHQSNTTLEELRKSEATIVHERNQLIEVYRELMTSQRP 239
Trim43b    RVYGKQCPPLSEERDQHIECLRHQSNTTLEELRKSEATIVHERNQLTEVYRELMTSQRP 240
Trim43c    RVYGKQCPPLSEERDQHIECLRHQSNTTLEELRKSEATIVHERNQLTEVYQELMTSQRP 240
*****.*:***** *****:*****

Trim43a    YQELLVQDLDDLFRRSKLAAKLDMPQGMIPRLHAHSIPGLTARLNSFRVKISFKHSIMFG 299
Trim43b    YQELLVQDLDDLFRRSKLAAKLDMPQGMIPRLRAHSIPGLTARLNSFRVKISFKHSIMFG 300
Trim43c    YQELLVQDLDDLFRRSKLAAKVDMPQGMIPRLRAHSIPGLTARLNSFRVKISFKHSIMFG 300
*****:*****:*****

Trim43a    YTSVRPFDIRLLHESTSLDSAETHRVSWGKKSFSRGKYYWEVDLKDHEQWTVGVRKDPWL 359
Trim43b    YTSLRPFDIRLLHESTSLDSAETHRVSWGKKSFSRGKYYWEVDLKDYRRWTVGVCKDPWL 360
Trim43c    YNSVRPFDIRLLHESTSLDSAKTHRVSWGKKSFSRGKYYWEVDLKDYRRWTVGVCKDPWL 360
**.*:*****:*****:*****:*****

Trim43a    RGRSYAATPTDLFLECLRKDHYILITRIGEHYIEKPVGQVGVFLDCEGGYVSFVDVA 419
Trim43b    RGRSYVATPTDLF-LECLRKDHYILITRIGEHYIEKPVGQVGVFLDCEGGYVSFVDVA 419
Trim43c    RGRSYVVTPTDIFLECLRNKDHYILITRIGREHYIEKPVGQVGVFLDCEGGYVSFVDVA 420
*****.*:*****.* *****:*****

Trim43a    KSSLILSYSPGTFHCAVRPFFSAVYT 445
Trim43b    KSSLILSYSPGTFHCAVRPFFSAVYT 445
Trim43c    KSSLILSYSPGTFHCAVRPFFFAAYT 446
*****.*:***** **

```

Supplemental Figure S3. Multiple alignment of Trim43a, Trim43b, and Trim43c.

| Primer                                        | Oligo Sequence                                                               |
|-----------------------------------------------|------------------------------------------------------------------------------|
| <i>Southern blot</i>                          |                                                                              |
| SB probe                                      | fwr TTGAAGGGCACCTCTGGTCATTAC                                                 |
| SB probe                                      | rev TACCCTGTCTCCTGATCATGGG                                                   |
| <i>CDS amplify</i>                            |                                                                              |
| CDS                                           | fwr ATGGAATCAGACAATTTACAAGACCC                                               |
| CDS                                           | rev TTATGTGTAGACAGCAGAGAAGAAAGGCC                                            |
| <i>qPCR primers</i>                           |                                                                              |
| qPCR                                          | fwr CCATGCCATTCCATTCTGG                                                      |
| qPCR                                          | rev TCTGACTGAGGTGTAGCCGAACATG                                                |
| qPCR nested                                   | fwr ATTCCATTCTGGGCTGACT                                                      |
| qPCR nested                                   | rev CTGACTGAGGTGTAGCCGAAC                                                    |
| Pou5f1                                        | fwr CGGTGTGAGGTGGAGTCTGGAGAC                                                 |
| Pou5f1                                        | rev CGCCGGTTACAGAACCATACTCG                                                  |
| Chuk nested                                   | fwr AGGACCGTGTCTCAAGGAGCTGT                                                  |
| Chuk nested                                   | rev CTCTGGTCTCATTTGCTTCACGA                                                  |
| <i>Antigen for antibody production</i>        |                                                                              |
| Ab                                            | fwr CCGGAATTCGATGTAGCTGTTCCAGGAGAAAATG                                       |
| Ab                                            | rev CCCAAGCTTCACTCCCGATAAACCTCTATTAGTTG                                      |
| <i>Promoter study</i>                         |                                                                              |
| Mlul 5kb up 1st exon                          | fwr ACGCGTGCAAGTATAGGGATGAAAAGTGAAC                                          |
| Mlul 5kb up ATG                               | fwr ACGCGTCCAAAGAGGTTCTATGGGAACCCCTAAACAAC                                   |
| 3 UTR                                         | fwr TCATAGGAAGCTGGAATCCAATGATG                                               |
| 3 UTR                                         | rev TCTGAGCCATCTCTCCATCC                                                     |
| strawberry                                    | fwr ATGGTGAGCAAGGCGAGGAGAATAAC                                               |
| strawberry                                    | rev TTAAGTTGTACAGCTCGTCCATGCCGC                                              |
| emerald                                       | fwr ATGGTGAGCAAGGCGAGGAGCTGTTTAC                                             |
| emerald                                       | rev TTAAGTTGTACAGCTCGTCCATGC                                                 |
| <i>Assymmetric PCR</i>                        |                                                                              |
| 5kb upATG promoter-strawberry overlapping for | fwr CTGCTTTTTTCCCTCAGAAAA ATGGTGAGCAAGGCGAGGAGAATAAC                         |
| strawberry-3'UTR overlapping rev              | rev CATACTGGATTCCAGCTTCTATGA TTAAGTTGTACAGCTCGTCCATGCCGC                     |
| 5kb upATG promoter-emerald overlapping for    | fwr CTGCTTTTTTCCCTCAGAAAAATGGTGAGCAAGGCGAGGAGCTGTTT                          |
| emerald-3'UTR overlapping rev                 | rev CATACTGGATTCCAGCTTCTATGATTACTTGTACAGCTCGTCC                              |
| <i>Transfection experiment-Flag tag</i>       |                                                                              |
| HindIII_kozac_flag                            | fwr CCCAAGCTTGCCACCATGGATTACAAGGATGACGACGATAAGATGGAATCAGACAATTTACAAGACCCCTCA |
| NotI_Trim43                                   | rev ATAAGAATGCGGCGCTCATGTGTAGACAGCAGAGAAAGAA                                 |
| HindIII_kozac_emerald                         | fwr CCCAAGCTTGCCACCATGGTGAGCAAGGCGAGGAGCTGTTTAC                              |
| emerald_half P2A peptide                      | rev GAAGGTCAAATTCAAAGTCTGTTTACCAGTCCGATGCCTTGTACAGCTCGTCCATGC                |
| half P2A BamHI flag trim43                    | fwr TCAAGTTGGCGGGAGAGCTCGAGTCCAACCTGGCCCGGATCCATGGATTACAAGGATGACGACGATAAG    |
| P2 overlapping                                | fwr TGAACAGACTTTGAATTTTACCTTCTCAAGTTGGCGGGAGAGCTCGAGTCCAA                    |

**Supplemental Figure S4.** Primer sequences used in the current study.

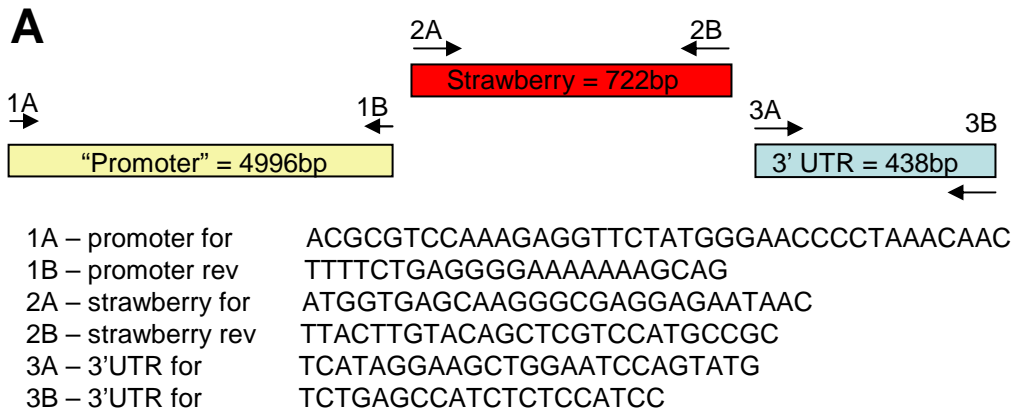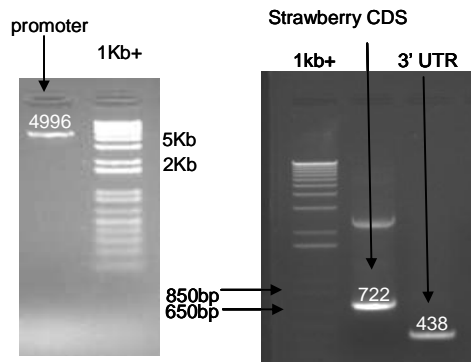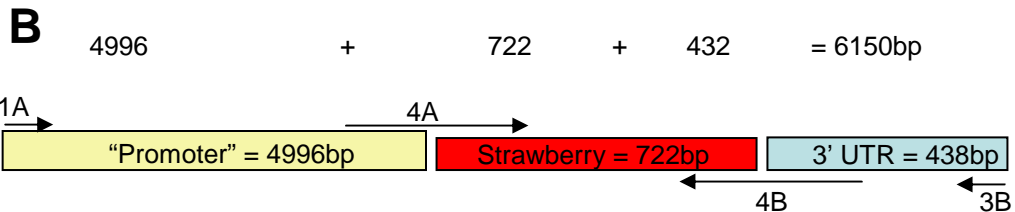

4A – promoter-strawberry overlapping for  
 CTGCTTTTTTCCCCTCAGAAAA ATGGTGAGCAAGGGCGAGGAGAATAAC

4B – strawberry-3'UTR overlapping rev  
 CATACTGGATTCCAGCTTCCTATGA TTACTTGTACAGCTCGTCCATGCCGC

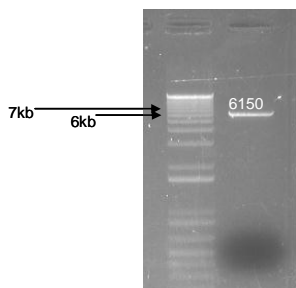

**Supplemental Figure S5. A** The promoter sequence and the 3'UTR of *Trim43a* were PCR amplified from RP23-46B12-BAC DNA giving a band of 4996 bp and 438 bp respectively. The CDS of strawberry fluorescent molecule was amplified from pRSET-B plasmid (722 bp). **B** The three fragments obtained were fused together by the use of two overlapping primers (4A, 4B).
